# Supplementary material for: Nitrate Removal Performance of Denitrifying Woodchip Bioreactors in Tropical Climates
Source: MDPI journal article supplement (doi:10.3390/w13243608), 2021-12-15
Supplement: s1 [file s1]

Archive with 1 entries (1 files):
- water-1476288-supplementary.pdf
